# Supplementary material
Source: PubMed Central journal article supplement (PMC2782281)
Supplement: tpc.109.069054_1.pdf [file tpc.109.069054_1.pdf]

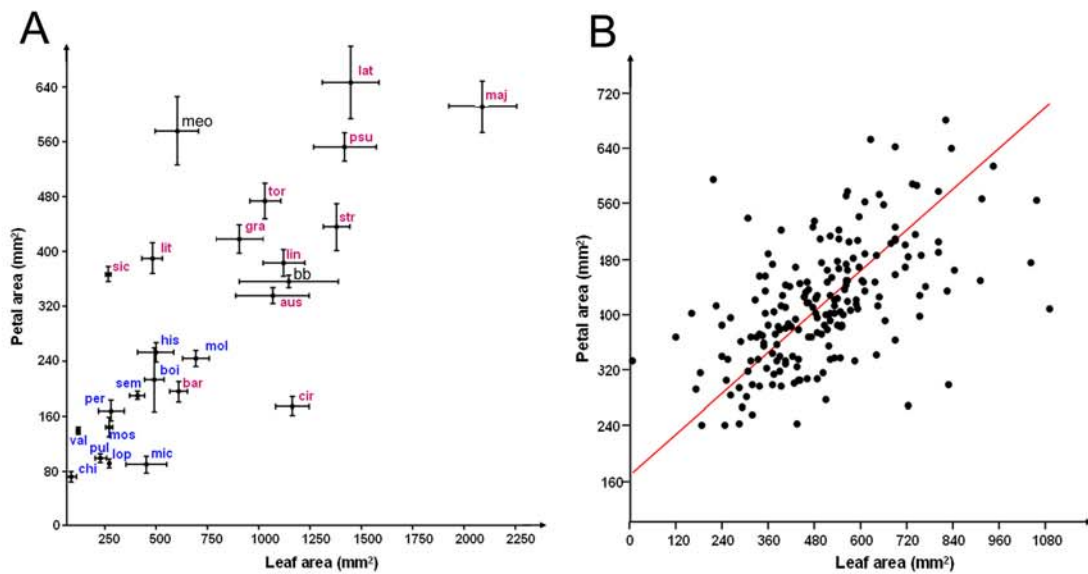

### Supplemental Figure 1 Correlations between leaf and petal areas

(A) Mean dorsal petal area plotted against mean leaf area ( $\pm$  standard errors) for each of the species ( $r = 0.65$  for all individuals; please see Supplemental Table 1 for details of sample sizes). Members of subsection *Antirrhinum* are shown in red, subsection *Kickxiella* in blue and *Streptosepalum* in black. aus = *A. australe*, bar = *A. braun-blanquetii*, boi = *A. boisieri*, chi = *A. charidemi*, cir = *A. cirrhigerum*, gra = *A. graniticum*, his = *A. hispanicum*, lat = *A. latifolium*, lin = *A. linkianum*, lit = *A. litigiosum*, lop = *A. lopesianum*, maj = *A. majus*, meo = *A. meonanthum*, mic = *A. microphyllum*, mol = *A. molle*, mos = *A. mollissimum*, per = *A. pertegasii*, psu = *A. pseudomajus*, pul = *A. pulverulentum*, sem = *A. sempervirens*, sic = *A. siculum*, str = *A. striatum*, tor = *A. tortuosum*, val = *A. valentinum*.

(B) Dorsal petal area plotted against leaf area for the F2 mapping population. The reduced major axis regression line is shown in red,  $r = 0.55$ .

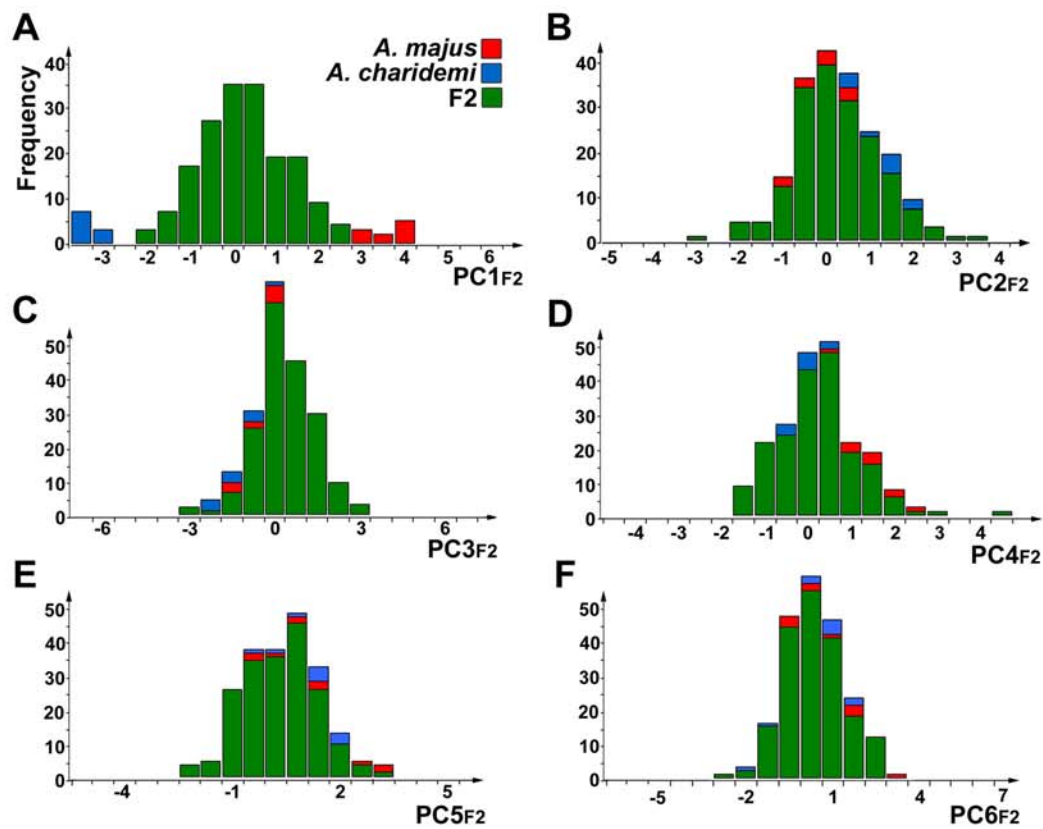

### Supplemental Figure2 Segregation of PCF2 values in F2 hybrids

Each histogram shows the distribution of F2 hybrids (green) along the first six PCs of the F2 allometry model (A-H), in relation to the values for their parents, *A. majus* (red) and *A. charidemi* (blue). PC values are shown on the x-axis in standard deviations from the mean of the F2 population.

**Supplemental Table 1 Antirrhinum accessions**

| Species <sup>a</sup>                  | Population <sup>b</sup>               | Mothers <sup>c</sup> | Offspring <sup>d</sup> |
|---------------------------------------|---------------------------------------|----------------------|------------------------|
| <i>A. australe</i> Rothm.             | Benamahoma, Cádiz, S                  | 2                    | 2                      |
|                                       | Grazalema, Cádiz, S                   | 1                    | 1                      |
|                                       | Villaluenga del Rosario, Cádiz, S     | 1                    | 1                      |
|                                       | Cortes de la Frontera, Málaga, S      | 1                    | 1                      |
|                                       | Benaolán, Málaga, S                   | 1                    | 1                      |
|                                       | Gaucin, Málaga, S                     | 1                    | 1                      |
|                                       | El Burgo, Málaga, S                   | 1                    | 2                      |
|                                       | Torcal de Antequera, Málaga, S        | 1                    | 1 (10)                 |
| <i>A. barrelieri</i> Boreau           | Alora, Málaga, S                      | 3                    | 3                      |
|                                       | Padul, Granada, S                     | 3                    | 4 (7)                  |
| <i>A. braun-blanquetii</i> Rothm.     | St Pietro de Villanueva, Asturias, S  | 1                    | 2 (2)                  |
| <i>A. boisierei</i> Rothm.            | Guadahortuna, Granada, S              | 1                    | 2                      |
| <i>A. charidemi</i> Lange             | Cabo de Gata, Almeria, S              | 1                    | 10 (10)                |
| <i>A. cirrhigerum</i> Welwitsch       | Gala, Coimbra, P                      | 2                    | 3                      |
|                                       | Praia de Mira, Coimbra, P             | 2                    | 3                      |
|                                       | Lisboa, Lisboa, P                     | 1                    | 1                      |
|                                       | Sagres, Faro, P                       | 2                    | 3 (10)                 |
| <i>A. graniticum</i> Roth.            | Bragança, Bragança, P                 | 1                    | 2                      |
|                                       | Gallur, Zaragoza, S                   | 1                    | 1                      |
|                                       | Fuentidueña deTajo, Madrid, S         | 1                    | 1                      |
|                                       | Chinchón, Madrid, S                   | 1                    | 1                      |
|                                       | Celorico da Beira, Guarda, P          | 1                    | 1                      |
|                                       | Tornavacas, Cáceres, S                | 1                    | 1                      |
|                                       | Navalperal de Tormes, Toledo, S       | 2                    | 2                      |
|                                       | Navacepeda de Tormes, Ávila,S         | 1                    | 1 (10)                 |
| <i>A. hispanicum</i> Chavannes        | Mecina Bombarón, Granada, S           | 2                    | 2                      |
|                                       | Balcón de Canales, Granada, S         | 1                    | 2                      |
|                                       | Almargen, Malaga, S                   | 4                    | 6 (10)                 |
| <i>A. latifolium</i> Millspaugh       | Roubion, Alpes-Maritime, F            | 3                    | 6                      |
|                                       | Bagà, Berguedà,S                      | 1                    | 1                      |
|                                       | Entrevaux, Alpes-de-Haute-Provence, F | 2                    | 3                      |
| <i>A. linkianum</i> Boissier & Reuter | Serra d Arrábida, Setúbal, P          | 1                    | 2                      |
|                                       | Almada, Setúbal, P                    | 1                    | 2                      |
|                                       | Sintra, Lisboa, P                     | 1                    | 1                      |
|                                       | Pernes, Santarém, P                   | 2                    | 2                      |
|                                       | Porto de Mós, Leiria, P               | 1                    | 1                      |
|                                       | Coimbra, Coimbra, P                   | 2                    | 2 (10)                 |
| <i>A. litigiosum</i> Pau              | Mas de Barberans, Tarragona, S        | 1                    | 1                      |
|                                       | Cheste, Valencia, S                   | 1                    | 1                      |
|                                       | Traiguera, Castello, S                | 1                    | 3                      |
|                                       | Santes Creus A, Tarragona, S          | 1                    | 2                      |
|                                       | Santes Creus B, Tarragona, S          | 1                    | 2                      |
|                                       | Borja, Zaragoza, S                    | 1                    | 1 (10)                 |
| <i>A. lopesianum</i> Rothm.           | Alfaiao, Bragança, P                  | 1                    | 10 (10)                |
| <i>A. majus</i> L.                    | John Innes Centre, inbred line        | 1                    | 10 (10)                |
| <i>A. meonanthum</i> Link             | Manteigas, Guarda, P                  | 4                    | 4                      |
|                                       | Sobradelo, Ourense, S                 | 1                    | 1 (5)                  |
| <i>A. microphyllum</i> Rothm.         | Sacedón, Guadalajara, S               | 5                    | 7 (7)                  |

|                                   |                                              |   |        |
|-----------------------------------|----------------------------------------------|---|--------|
| <i>A. molle</i> L.                | Gerri de la Sal, Lleida, S                   | 1 | 2      |
|                                   | Seu de Urgell, Lleida, S                     | 2 | 2      |
|                                   | Saldes, Berguedà, S                          | 1 | 2      |
|                                   | South of Seu de Urgel, Lleida, S             | 1 | 2      |
|                                   | Bagá, Barcelona, S                           | 1 | 1      |
|                                   | Martinet, Lleida, S                          | 1 | 1 (10) |
| <i>A. mollissimum</i> Rothm.      | Capileira, Granada, S                        | 1 | 1      |
|                                   | Felix, Almería, S                            | 1 | 1      |
|                                   | Enix, Almería, S                             | 1 | 1      |
|                                   | Canjáyar, Almería, S                         | 2 | 2      |
|                                   | Bayárcal, Almería, S                         | 1 | 1      |
|                                   | Juvíles, Granada, S                          | 1 | 1      |
|                                   | Trevélez, Granada, S                         | 1 | 1      |
|                                   | Bubión, Granada, S                           | 1 | 1      |
|                                   | Lanjarón, Granada, S                         | 1 | 1 (10) |
| <i>A. pertegasii</i> Rothm.       | Near Pego, Alicante, S                       | 2 | 4      |
|                                   | Albacete, Albacete, S                        | 1 | 1 (5)  |
| <i>A. pseudomajus</i> Rothm.      | Ribes de Freser, Girona, S                   | 2 | 5      |
|                                   | Minerve, Aude, F                             | 3 | 4      |
|                                   | Prats-de-Mollo-la-P., Pyrénées-Orientales, F | 1 | 1 (10) |
| <i>A. pulverulentum</i> Lazaro    | Pelegrina, Guadalajara, S                    | 1 | 1      |
|                                   | Alcorlo, Guadalajara, S                      | 6 | 9 (10) |
| <i>A. sempervirens</i> Lapeyrouse | Héas, Hautes-Pyrénées, F                     | 1 | 5      |
|                                   | Col d'Aubisque, Pyrénées-Atlantiques, F      | 4 | 5 (10) |
| <i>A. siculum</i> Miller          | Taormina, Sicilia, I                         | 2 | 5      |
|                                   | Palermo, Sicilia, I                          | 1 | 1      |
|                                   | Vicolo del Gargano, Puglia, I                | 1 | 1      |
|                                   | Unknown, ex IPK Gatersleben genebank         | 2 | 3 (10) |
| <i>A. striatum</i> Rothm.         | Alet Les Bains, Aude, F                      | 1 | 1 (1)  |
| <i>A. tortuosum</i> Bosc          | Casas de El Cañizar, Cuenca, S               | 1 | 1      |
|                                   | El Tempul, Cádiz, S                          | 1 | 1      |
|                                   | Casares, Málaga, S                           | 1 | 1      |
|                                   | Marbella, Málaga, S                          | 1 | 1      |
|                                   | Almargen, Málaga, S                          | 1 | 1      |
|                                   | Loja, Granada, S                             | 1 | 1      |
|                                   | Priego de Córdoba, Córdoba, S                | 1 | 1      |
|                                   | Alcaudete, Jaén, S                           | 1 | 1      |
|                                   | Cerro Muriano, Córdoba, S                    | 1 | 1      |
|                                   | Gibraltar                                    | 1 | 1 (10) |

- a: Taxa sometimes regarded as subspecies of *A. majus* are considered to rank as separate species for clarity. *A. majus* refers here only to the inbred parent of the F2 mapping population, derived from cultivated stocks.
- b: The location of each population from which seeds were sampled. S = Spain, F = France, P = Portugal, I = Italy. The number of populations sampled for each species broadly reflects its geographic range.
- c: The number of maternal parents sampled from each population.
- d: The number of offspring from each population that were used in allometric analysis. The figure in parentheses against the last population of each species shows the total number of individuals analysed for that species.

**Supplemental Table 2 A molecular recombination map for the *A. majus* x *A. charidemi* F2 population**

| <b>Marker<sup>a</sup></b>  | <b>position (cM)<sup>b</sup></b> | <b>Dominance<sup>c</sup></b> | <b>Type<sup>d</sup></b> | <b>Plants genotyped<sup>e</sup></b> |
|----------------------------|----------------------------------|------------------------------|-------------------------|-------------------------------------|
| 1:01                       | 0                                | c                            | CAPS                    | 175                                 |
| 1:02 (AJ568102 46)         | 14                               | c                            | CAPS                    | 198                                 |
| 1:03                       | 20                               | c                            | synth                   | 204                                 |
| 1:04                       | 22                               | c                            | synth                   | 203                                 |
| 1:05                       | 24                               | dm                           | synth                   | 203                                 |
| 1:06                       | 25                               | c                            | synth                   | 203                                 |
| 1:07                       | 27                               | dc                           | AFLP                    | 197                                 |
| 1:08                       | 34                               | d                            | AFLP                    | 201                                 |
| 1:09                       | 37                               | c                            | SSLP                    | 170                                 |
| 1:10                       | 39                               | dm                           | AFLP                    | 187                                 |
| 1:11                       | 41                               | dm                           | AFLP                    | 191                                 |
| 1:12                       | 43                               | c                            | synth                   | 203                                 |
| 1:13                       | 46                               | c                            | synth                   | 204                                 |
| 1:14                       | 52                               | dc                           | AFLP                    | 191                                 |
| 1:15                       | 53                               | c                            | CAPS                    | 183                                 |
| 1:16                       | 57                               | d                            | AFLP                    | 185                                 |
| 1:17                       | 63                               | dc                           | AFLP                    | 171                                 |
| 1:18                       | 82                               | dc                           | AFLP                    | 200                                 |
| 1:19 (X03710 <i>NIV</i> )  | 84                               | c                            | CAPS                    | 135                                 |
| 1:20                       | 85                               | dc                           | CAPS                    | 95                                  |
| 1:21                       | 87                               | dc                           | AFLP                    | 203                                 |
| 1:22                       | 90                               | dm                           | AFLP                    | 201                                 |
| 2:01                       | 0                                | dc                           | CAPS                    | 162                                 |
| 2:02                       | 13                               | dc                           | SSLP                    | 147                                 |
| 2:03 (X92369 <i>SBP</i> )  | 23                               | d                            | CAPS                    | 138                                 |
| 2:04                       | 32                               | dm                           | AFLP                    | 165                                 |
| 2:05                       | 43                               | dm                           | SSLP                    | 152                                 |
| 2:06 (X63701 <i>SQUA</i> ) | 46                               | c                            | CAPS                    | 198                                 |
| 2:07                       | 52                               | dc                           | AFLP                    | 203                                 |
| 2:08                       | 54                               | c                            | SSLP                    | 191                                 |
| 2:09                       | 55                               | dm                           | AFLP                    | 200                                 |
| 2:10                       | 57                               | c                            | synth                   | 192                                 |
| 2:11                       | 60                               | c                            | synth                   | 203                                 |
| 2:12 (S53900 <i>PLE</i> )  | 66                               | c                            | CAPS                    | 132                                 |
| 2:13                       | 68                               | dm                           | AFLP                    | 199                                 |
| 2:14                       | 71                               | c                            | CAPS                    | 105                                 |
| 2:15                       | 76                               | c                            | synth                   | 192                                 |
| 2:16                       | 82                               | dm                           | AFLP                    | 198                                 |
| 2:17                       | 85                               | c                            | synth                   | 192                                 |
| 2:18                       | 87                               | dc                           | AFLP                    | 197                                 |
| 2:19                       | 92                               | c                            | synth                   | 202                                 |
| 2:20                       | 94                               | dc                           | AFLP                    | 189                                 |
| 2:21                       | 99                               | dc                           | AFLP                    | 199                                 |
| 2:22                       | 104                              | dc                           | AFLP                    | 185                                 |
| 3:01                       | 0                                | dm                           | AFLP                    | 184                                 |
| 3:02                       | 14                               | dc                           | CAPS                    | 190                                 |
| 3:03                       | 15                               | dc                           | AFLP                    | 185                                 |
| 3:04                       | 18                               | c                            | synth                   | 203                                 |
| 3:05                       | 19                               | dm                           | AFLP                    | 200                                 |
| 3:06                       | 21                               | dc                           | AFLP                    | 190                                 |
| 3:07                       | 24                               | dm                           | AFLP                    | 204                                 |
| 3:08 (AJ568098 42)         | 24                               | c                            | CAPS                    | 198                                 |
| 3:09                       | 26                               | dm                           | AFLP                    | 190                                 |
| 3:10                       | 27                               | dm                           | AFLP                    | 190                                 |
| 3:11                       | 27                               | dm                           | synth                   | 203                                 |
| 3:12                       | 28                               | dm                           | CAPS                    | 194                                 |
| 3:13 (M55525 <i>FLO</i> )  | 30                               | dm                           | CAPS                    | 193                                 |
| 3:14                       | 32                               | dm                           | AFLP                    | 191                                 |
| 3:15                       | 34                               | dm                           | AFLP                    | 201                                 |
| 3:16                       | 37                               | c                            | synth                   | 203                                 |
| 3:17                       | 45                               | dm                           | AFLP                    | 190                                 |

|                        |     |    |       |     |
|------------------------|-----|----|-------|-----|
| 3:18                   | 49  | c  | synth | 202 |
| 3:19                   | 52  | dc | AFLP  | 199 |
| 3:20                   | 53  | dc | AFLP  | 203 |
| 3:21 (AJ804282 214)    | 58  | c  | CAPS  | 94  |
| 3:22                   | 59  | dc | AFLP  | 199 |
| 3:23                   | 60  | dm | AFLP  | 191 |
| 3:24                   | 69  | c  | CAPS  | 191 |
| 3:25 (AJ250397 CYCD3A) | 78  | c  | CAPS  | 198 |
| 4:01                   | 0   | c  | CAPS  | 107 |
| 4:02                   | 7   | c  | synth | 203 |
| 4:03                   | 12  | c  | synth | 203 |
| 4:04                   | 16  | c  | CAPS  | 182 |
| 4:05                   | 19  | dm | AFLP  | 188 |
| 4:06                   | 24  | dm | AFLP  | 191 |
| 4:07                   | 33  | c  | synth | 204 |
| 4:08                   | 38  | c  | CAPS  | 133 |
| 4:09                   | 41  | c  | synth | 203 |
| 4:10                   | 44  | c  | synth | 202 |
| 4:11                   | 48  | c  | CAPS  | 87  |
| 4:12                   | 50  | dm | AFLP  | 165 |
| 4:13                   | 52  | c  | synth | 204 |
| 4:14 (AJ803243 74)     | 53  | dc | CAPS  | 106 |
| 4:15                   | 54  | c  | CAPS  | 202 |
| 4:16                   | 56  | dc | AFLP  | 190 |
| 4:17                   | 58  | c  | CAPS  | 197 |
| 4:18                   | 60  | c  | synth | 204 |
| 4:19                   | 62  | dm | AFLP  | 173 |
| 4:20                   | 66  | c  | synth | 203 |
| 4:21 (AY072735 INA)    | 69  | c  | CAPS  | 197 |
| 4:22                   | 74  | c  | synth | 201 |
| 4:23                   | 77  | dm | AFLP  | 191 |
| 4:24                   | 80  | dm | synth | 204 |
| 4:25                   | 85  | dm | AFLP  | 201 |
| 4:26                   | 89  | dc | AFLP  | 191 |
| 4:27                   | 92  | c  | CAPS  | 190 |
| 4:28                   | 94  | dm | AFLP  | 191 |
| 4:29                   | 98  | dm | AFLP  | 185 |
| 4:30                   | 104 | c  | synth | 192 |
| 4:31                   | 115 | c  | CAPS  | 191 |
| 5:01                   | 0   | dm | AFLP  | 203 |
| 5:02                   | 17  | dm | AFLP  | 201 |
| 5:03                   | 20  | c  | SSLP  | 189 |
| 5:04 (AJ568103 48)     | 21  | dc | CAPS  | 132 |
| 5:05                   | 29  | dc | synth | 202 |
| 5:06                   | 29  | d  | synth | 192 |
| 5:07                   | 32  | c  | synth | 192 |
| 5:08                   | 34  | dc | AFLP  | 201 |
| 5:09 (AJ568044 113)    | 38  | dm | CAPS  | 174 |
| 5:10                   | 48  | dm | AFLP  | 201 |
| 5:11                   | 55  | c  | synth | 192 |
| 5:12                   | 62  | dc | AFLP  | 188 |
| 5:13                   | 65  | dm | AFLP  | 204 |
| 5:14                   | 70  | dm | AFLP  | 191 |
| 5:15                   | 76  | dm | AFLP  | 187 |
| 6:01                   | 0   | dm | AFLP  | 188 |
| 6:02                   | 17  | dc | AFLP  | 191 |
| 6:03                   | 22  | c  | CAPS  | 179 |
| 6:04 (AF208341 CYC)    | 35  | c  | CAPS  | 105 |
| 6:05 (AJ804396 203)    | 49  | c  | CAPS  | 201 |
| 6:06                   | 54  | dm | AFLP  | 187 |
| 6:07                   | 55  | dc | AFLP  | 187 |
| 6:08                   | 64  | c  | CAPS  | 138 |
| 6:09                   | 67  | dm | AFLP  | 192 |
| 6:10                   | 68  | dm | AFLP  | 192 |
| 6:11                   | 71  | dm | AFLP  | 182 |
| 7:01                   | 0   | c  | CAPS  | 117 |

|                             |    |    |       |     |
|-----------------------------|----|----|-------|-----|
| 7:02 (Y14857 <i>FAP2</i> )  | 13 | c  | CAPS  | 196 |
| 7:03                        | 17 | dc | CAPS  | 105 |
| 7:04                        | 17 | dm | AFLP  | 190 |
| 7:05                        | 23 | dm | AFLP  | 192 |
| 7:06                        | 24 | dc | AFLP  | 199 |
| 7:07                        | 31 | c  | synth | 199 |
| 7:08                        | 34 | dm | AFLP  | 190 |
| 7:09                        | 39 | dm | CAPS  | 181 |
| 7:10                        | 41 | dm | AFLP  | 200 |
| 7:11 (AJ568042 <i>107</i> ) | 43 | c  | CAPS  | 201 |
| 7:12                        | 44 | dm | synth | 192 |
| 7:13                        | 45 | c  | synth | 204 |
| 7:14                        | 46 | c  | synth | 203 |
| 7:15                        | 50 | dc | AFLP  | 192 |
| 7:16                        | 53 | c  | synth | 203 |
| 7:17                        | 59 | dm | AFLP  | 192 |
| 7:18                        | 61 | dc | AFLP  | 202 |
| 7:19                        | 70 | dm | AFLP  | 183 |
| 7:20                        | 74 | dc | AFLP  | 203 |
| 8:01 (X62810 <i>DEF</i> )   | 0  | d  | CAPS  | 191 |
| 8:02                        | 17 | d  | AFLP  | 199 |
| 8:03                        | 20 | c  | CAPS  | 177 |
| 8:04                        | 22 | c  | CAPS  | 138 |
| 8:05                        | 24 | c  | synth | 192 |
| 8:06                        | 26 | d  | AFLP  | 190 |
| 8:07                        | 29 | c  | synth | 202 |
| 8:08                        | 32 | c  | synth | 204 |
| 8:09                        | 35 | c  | synth | 204 |
| 8:10                        | 36 | d  | AFLP  | 203 |
| 8:11                        | 40 | d  | CAPS  | 158 |
| 8:12                        | 47 | c  | synth | 203 |
| 8:13                        | 51 | c  | synth | 203 |
| 8:14                        | 52 | d  | synth | 204 |
| 8:15 (AJ568075 <i>26</i> )  | 55 | c  | CAPS  | 197 |
| 8:16                        | 56 | c  | synth | 204 |
| 8:17                        | 59 | c  | synth | 203 |
| 8:18                        | 62 | c  | synth | 203 |
| 8:19                        | 64 | d  | AFLP  | 177 |
| 8:20                        | 72 | d  | AFLP  | 190 |
| 8:21                        | 75 | d  | AFLP  | 189 |
| 8:22                        | 78 | c  | CAPS  | 122 |
| 8:23                        | 86 | c  | CAPS  | 197 |

a: Each locus is named according to its relative order within the eight linkage groups of *Antirrhinum* – e.g. 1:02 is the second marker from the top of Linkage Group 1. The map was estimated with *Joinmap 2.0* software, taking a LOD value of 7.0 as the minimum support for a linkage group and using default parameters for estimating marker positions within groups. For loci that were used in a previous recombination map for *Antirrhinum* (Schwarz-Sommer et al., 2003), sequence accession numbers are given in parentheses with the previous name of the locus in italics. The linkage groups are numbered and oriented as in the previous map.

b: The estimated position of the locus relative to the first marker in the linkage group, in centiMorgans estimated from recombination fractions using the Kosambi function.

c: Dominance of markers. *c* denotes a co-dominant marker, *dc* a dominant marker originating from the *A. charidemi* parent and *dm* a dominant marker from the *A. majus* parent.

d: Amplified fragment length polymorphisms (shown as *AFLP*) were generated from *Pst*I – *Mse*I restriction fragments, using six different combinations of selective primers. To simplify QTL analysis, AFLPs that mapped to the same position were combined to create synthetic loci (*synth*) with a dominant allele if the AFLPs came from the same parent or co-dominant alleles if the AFLPs were in repulsion. *CAPS* denotes a marker amplified from a protein coding gene and detected usually as a restriction fragment length polymorphism. *SSLP* denotes a microsatellite marker located in a non-coding sequence.

e: The number of F2 individuals from the population of 204 plants that were genotyped at each locus.

## References

**Langlade, N.B., Feng, X., Dransfield, T., Copsey, L., Hanna, A.I., Thébaud, C., Bangham, A., Hudson, A., and Coen, E.** (2005) Evolution through genetically controlled allometry space. *Proc. Natl. Acad. Sci. USA* **102**:10221-10226.

**Schwarz-Sommer, Z., de Andrade, S.E., Berndtgen, R., Lönnig, W.E., Müller, A., Nindl, I., Stüber, K., Wunder, J., Saedler, H., Gübitz, T., Borking, A., Golz, J.F., Ritter, E., and Hudson, A.** (2003) A linkage map of an F2 hybrid population of *Antirrhinum majus* and *A. molle*. *Genetics* **163**:699-710.
